# Supplementary material for: An inclusion complex of cucurbit[7]uril with benzimidazolyl benzyl viologen exhibits fluorescence and photochromic properties
Source: Royal Society of Chemistry journal article supplement (doi:10.1039/d2cp03516b), 2022-01-01

## Electronic Supplementary Information

# Inclusion Complex of Cucurbit[7]uril with Benzimidazolyl Benzyl Viologen Showing Fluorescence and Photochromic Properties

Qin Wang,<sup>a</sup> Jun-Zhuo Guo,<sup>a</sup> Dan Luo,<sup>a</sup> Ming-Fu Ye,<sup>a,b</sup> Rui-Lian Lin,<sup>\*a</sup> Wen-Qi Sun<sup>a</sup> and Jing-Xin Liu<sup>\*a</sup>

---

<sup>a</sup> College of Chemistry and Chemical Engineering, Anhui University of Technology, Maanshan 243001, PR China. [jxliu411@ahut.edu.cn](mailto:jxliu411@ahut.edu.cn)

<sup>b</sup> Information Materials and Devices Applications Key Laboratory of Sichuan Provincial Universities, Chengdu University of Information Technology, Chengdu 610225, PR China

### Table of Contents

|                                                                                                            |            |
|------------------------------------------------------------------------------------------------------------|------------|
| <b>Fig. S1.</b> <sup>1</sup> H NMR of guest molecule <b>1</b> ·Cl <sub>3</sub> .....                       | <b>S2</b>  |
| <b>Fig. S2.</b> <sup>13</sup> C NMR of guest molecule <b>1</b> ·Cl <sub>3</sub> .....                      | <b>S3</b>  |
| <b>Fig. S3.</b> HRMS of guest molecule <b>1</b> ·Cl <sub>3</sub> .....                                     | <b>S4</b>  |
| <b>Fig. S4.</b> 2D gCOSY spectrum of the inclusion complex <b>1</b> <sup>3+</sup> @Q[7].....               | <b>S5</b>  |
| <b>Fig. S5.</b> 2D gCOSY spectrum of the inclusion complex <b>1</b> <sup>3+</sup> @Q[7] <sub>2</sub> ..... | <b>S6</b>  |
| <b>Fig. S6.</b> The ESI-MS for the inclusion complex <b>1</b> <sup>3+</sup> @Q[7].....                     | <b>S7</b>  |
| <b>Fig. S7.</b> The ESI-MS for the inclusion complex <b>1</b> <sup>3+</sup> @Q[7] <sub>2</sub> .....       | <b>S8</b>  |
| <b>Fig. S8.</b> <sup>1</sup> H NMR titration of Q[7] with 2-methylbenzimidazolium chloride.....            | <b>S9</b>  |
| <b>Fig. S9.</b> ESR spectra of the compounds <b>1</b> ·Cl <sub>3</sub> and ( <b>1</b> -2H)·Cl.....         | <b>S10</b> |
| <b>Fig. S10.</b> ESR spectra of the compounds 2-methylbenzimidazolium chloride and methyl viologen.....    | <b>S11</b> |

**Fig. S1.**  $^1\text{H}$  NMR of guest molecule  $1 \cdot \text{Cl}_3$  in  $\text{D}_2\text{O}$ .

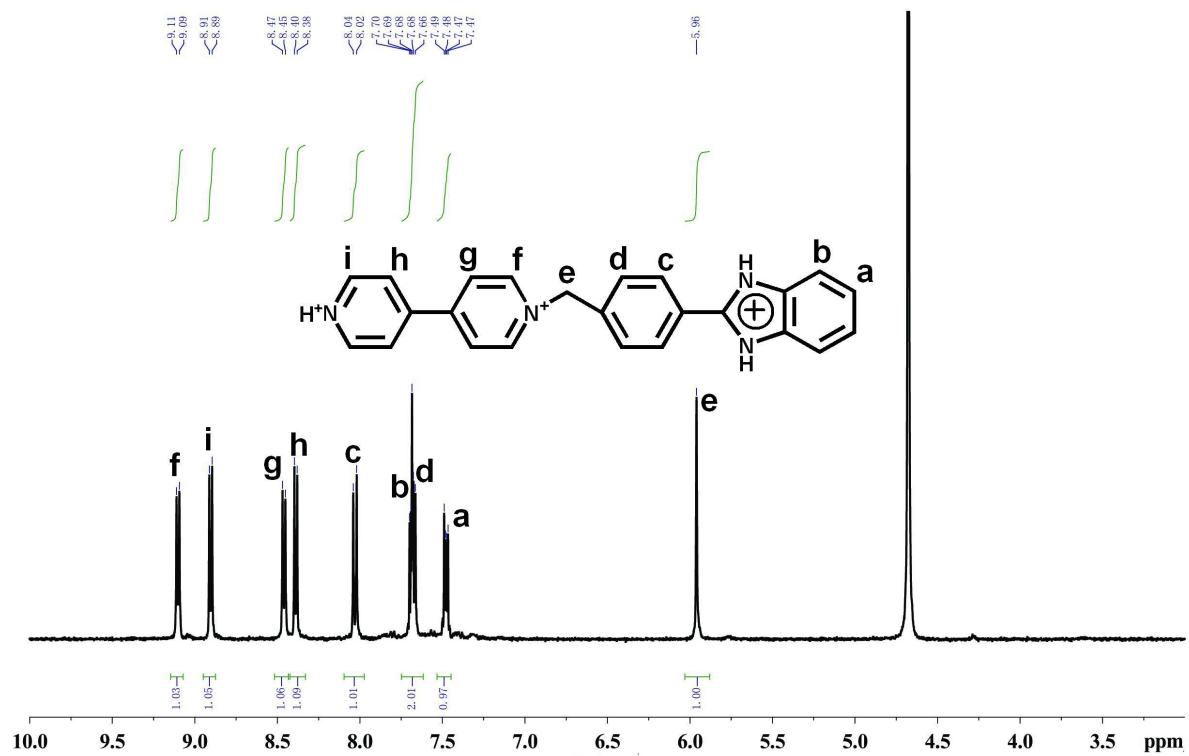

**Fig. S2.**  $^{13}\text{C}$  NMR of guest molecule  $\mathbf{1}\cdot\text{Cl}_3$  in  $\text{D}_2\text{O}$ .

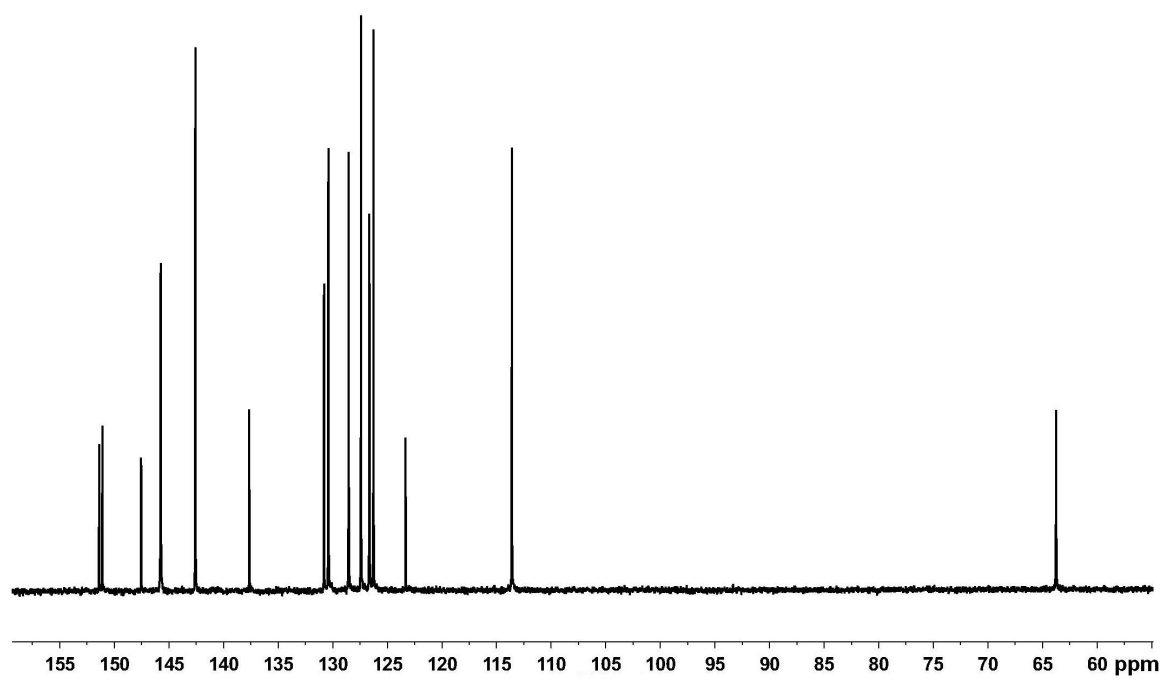

**Fig. S3.** HRMS of guest molecule (1-2H)<sup>+</sup>.

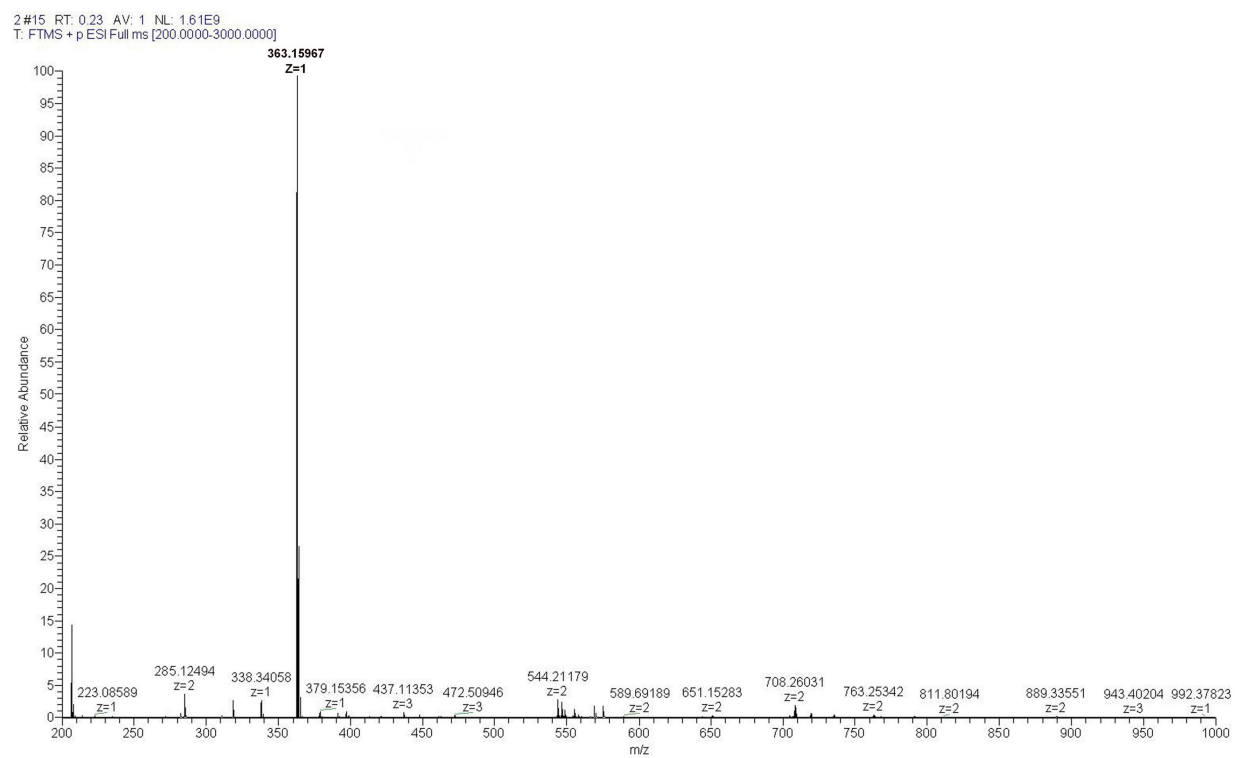

**Fig. S4.** 2D gCOSY spectrum of the inclusion complex  $1^{3+}@Q[7]$  in  $D_2O$ .

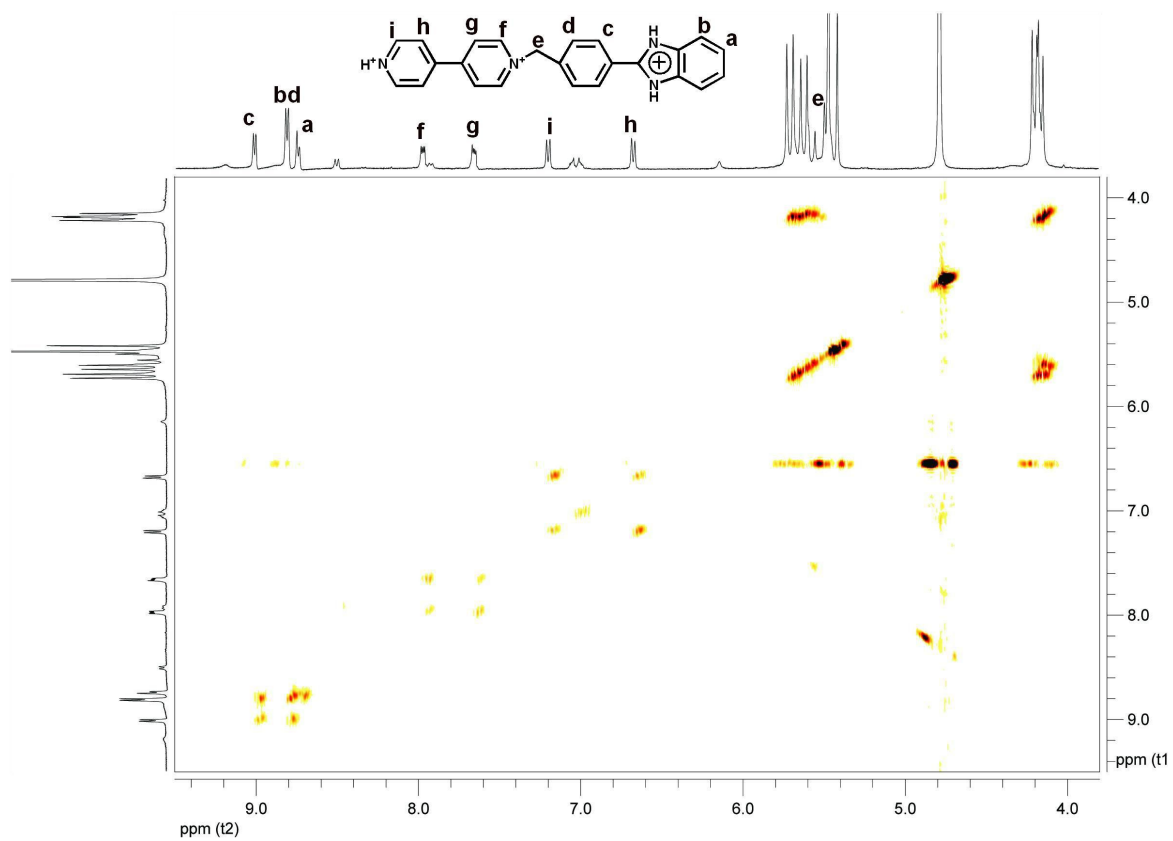

**Fig. S5.** 2D gCOSY spectrum of the inclusion complex  $1^{3+}@Q[7]_2$  in  $D_2O$ .

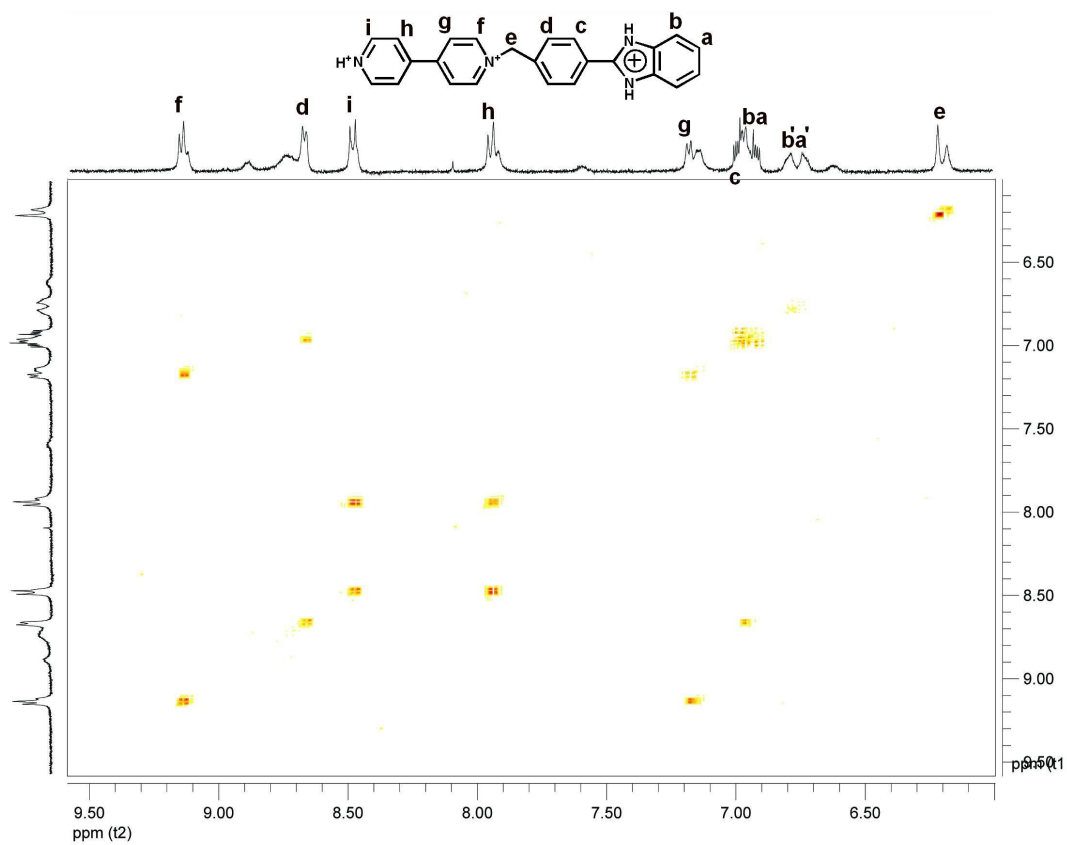

**Fig. S6.** The ESI-MS for the inclusion complex  $1^{3+}@Q[7]$ .

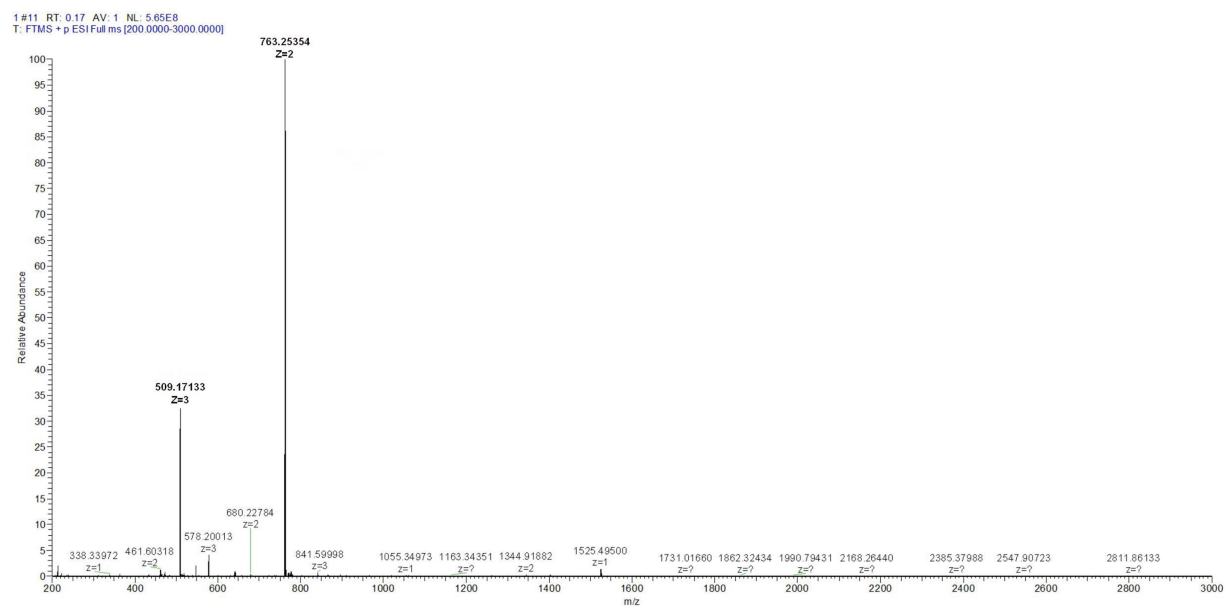

**Fig. S7.** The ESI-MS for the inclusion complex  $1^{3+}@Q[7]_2$ .

1 #11 RT: 0.17 AV: 1 NL: 3.57E6  
T: FTMS + p ESI Full ms [200.0000-3000.0000]

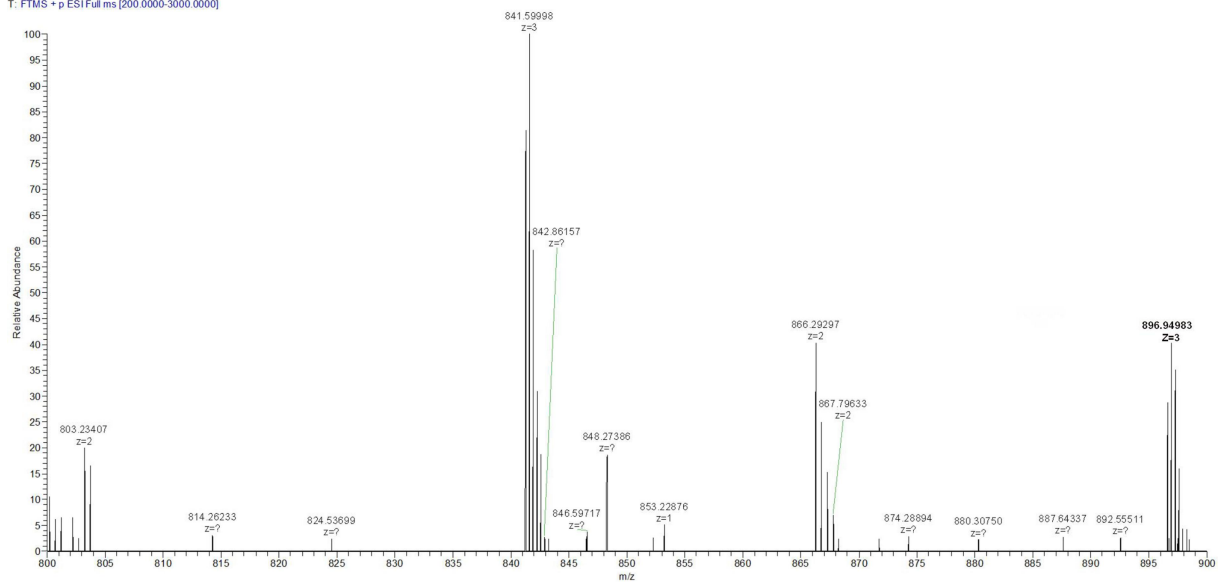



**Fig. S8.** (A)  $^1\text{H}$  NMR spectra (400 MHz,  $\text{D}_2\text{O}$ ) of 2-methylbenzimidazolium chloride in different equiv. of Q[7] at 20 °C. (B)  $^1\text{H}$  NMR titration curve of 2-methylbenzimidazolium chloride by addition of Q[7] in  $\text{D}_2\text{O}$ .

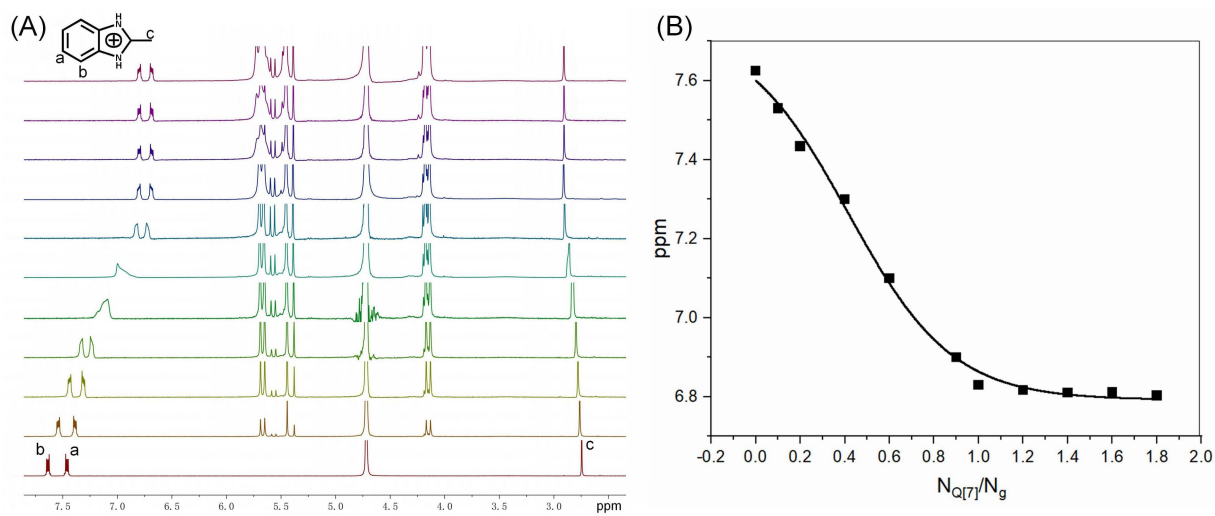

**Fig. S9.** ESR spectra of the compounds  $1\cdot\text{Cl}_3$  and  $(1-2\text{H})\cdot\text{Cl}$ .

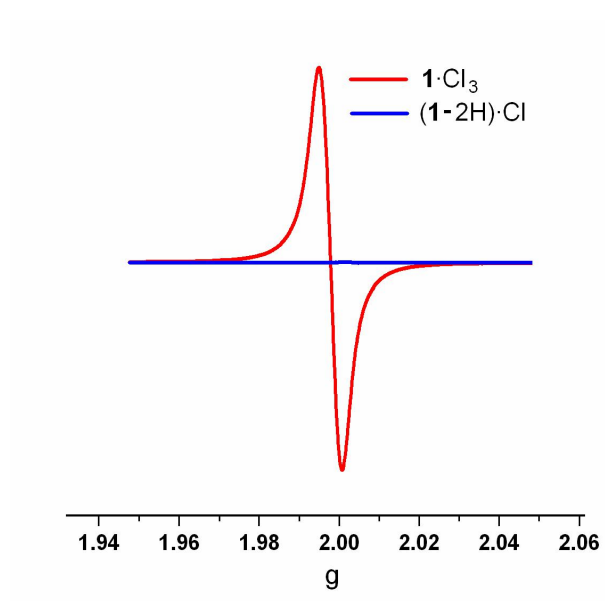

**Fig. S10.** ESR spectra of the compounds 2-methylbenzimidazolium chloride and methyl viologen.

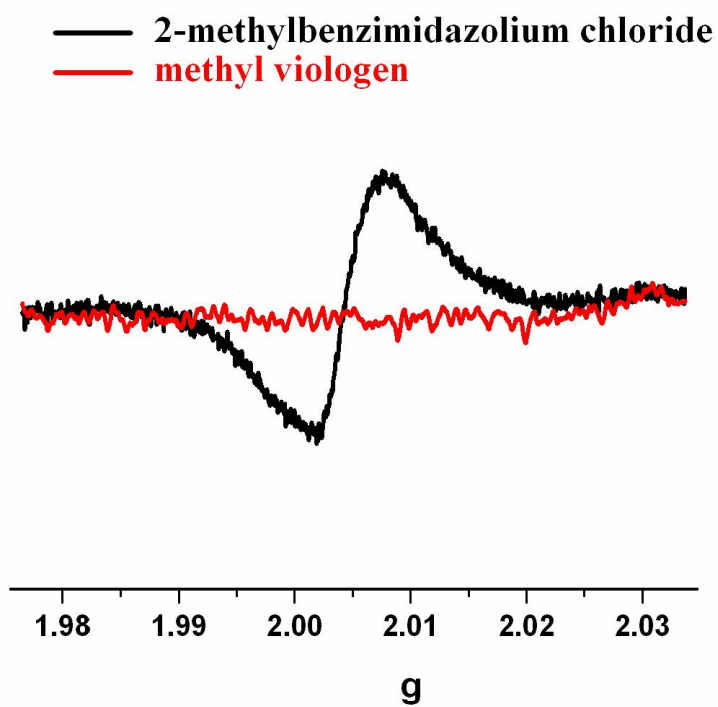

Supplement: d2cp03516b1.pdf [file d2cp03516b1.pdf]
